# Supplementary material
Source: publisher figshare collection journal article supplement (https://acs.figshare.com/ndownloader/files/3992335)
Supplement: Supplementary file 1 [file 3992335]

**Supporting Information for**

**Synthesis and Physical Properties of the Conjugated Dendrons**

**Bearing Twisted Acenes Used in Solution-Processing of Organic**

**Light-Emitting Diodes**

Zhenying Liu,<sup>†</sup> Jinchong Xiao,<sup>†\*</sup> Qiang Fu,<sup>‡</sup> Huanran Feng,<sup>†</sup> Xuemin Zhang,<sup>†</sup> Tiejun Ren,<sup>†</sup> Sujuan Wang,<sup>†</sup> Dongge Ma,<sup>‡\*</sup> Xuefei Wang,<sup>§\*</sup> Hua Chen<sup>†\*</sup>

<sup>†</sup> College of Chemistry and Environment Science, Key Laboratory of Chemical Biology of Hebei Province, Hebei University, Baoding 071002, P. R. China

<sup>‡</sup> State Key Laboratory of Polymer Physics and Chemistry, Changchun Institute of Applied Chemistry, Chinese Academy of Sciences, Changchun 130022, P. R. China

<sup>§</sup> School of Chemistry and Chemical Engineering of University of Chinese Academy of Sciences Beijing P. R. China 100049

E-mail: [jcxiaoiccas@gmail.com](mailto:jcxiaoiccas@gmail.com); [mdg1014@ciac.jl.cn](mailto:mdg1014@ciac.jl.cn); [wangxf@iccas.ac.cn](mailto:wangxf@iccas.ac.cn);  
[hua-todd@hbu.edu.cn](mailto:hua-todd@hbu.edu.cn)

**Contents**

|                                 |            |
|---------------------------------|------------|
| Materials, methods.....         | page S2-S7 |
| Figure S1,2 and Table S1-2..... | page S8    |
| Table S3, Figure S3.....        | page S9    |
| Figure S4 and S5.....           | page S10   |
| Figure S6 and S7.....           | page S11   |
| Figure S8 and S9.....           | page S12   |
| Figure S10 and S11.....         | page S13   |
| Figure S12 and S13.....         | page S14   |
| Figure S14 and S15.....         | page S15   |
| Figure S16 and S17.....         | page S16   |
| Figure S18 and S19.....         | page S17   |
| Figure S20 and S21.....         | page S18   |

## Experimental Section

### *Materials and Characterization:*

NMR spectra were measured on Bruker 600 MHz spectrometer using  $\text{CDCl}_3$  as a solvent without any internal standard. MALDI-TOF mass spectrometric measurements were performed on Bruker Biflex III MALDI-TOF. UV-vis and fluorescence spectra were carried out on Shimadzu UV-2550 and RF5300PC spectrometer. Cyclic voltammograms were measured on CHI 630 A electrochemical analyzer with a standard three-electrode cell in a 0.1 M tetrabutylammonium hexafluorophosphate solution dissolved in  $\text{CH}_2\text{Cl}_2$  in nitrogen atmosphere at a rate of  $0.1 \text{ V s}^{-1}$ .

### *Device Fabrication and Measurement*

The general procedure was presented as follows. Indium-tin oxide (ITO)-coated glass substrates were pre-cleaned and treated by UV ozone for 15 min. PEDOT: PSS (Baytron PVP CH 8000) aqueous solution was spin-coated onto the ITO substrate and baked at  $110^\circ\text{C}$  for 30 min. Then the substrates were transferred to glove box, where the emitting layers (10 mg/mL) were spin-coated onto the PEDOT:PSS layer from chloroform solution and annealed at  $100^\circ\text{C}$  for 30 min. In evaporation chamber, TPBi (Nichem Fine Technology Co. Ltd.) was evaporated at an evaporation rate of 2 Hz/s under a pressure of  $1.1 \times 10^{-3} \text{ Pa}$  and the LiF/Al bilayer cathode was evaporated at evaporation rates of 0.1 and 10~15 Hz/s for LiF and Al (Sigma- aldrich), respectively, under a pressure of  $1.1 \times 10^{-3} \text{ Pa}$ . The current-luminance-voltage characteristics were measured by a Keithley source measurement unit (Keithley 2400 and Keithley 2000)

with a calibrated silicon photodiode. The electroluminescent spectra were carried out with a PR650 Spectrophotometer.

### *Synthesis*

#### Compound

1,4-di(2-(5,12-diphenyl-6:7,10:11-bis(4'-tert-butylbenzo)tetracene))benzene (**DPPh**).

A mixture of compound **1** (250 mg, 0.39 mmol), 1,4-benzenediboronic acid (**2**, 20 mg, 0.12 mmol), Pd(PPh<sub>3</sub>)<sub>4</sub> (52 mg, 0.045 mmol) and Na<sub>2</sub>CO<sub>3</sub> (437 mg, 4 mmol) in THF/H<sub>2</sub>O (40 mL/4mL, v/v, 10:1) was stirred in 60 °C for 5 days in nitrogen atmosphere. The mixture solution was cooled to room temperature and brine was added. After extracted with methylene chloride (50 mL × 4), the organic phase was collected, dried with sodium sulfate and further concentrated in reduced pressure. The as-obtained residue was purified through silica gel column chromatography with petroleum ether firstly and then methylene chloride/petroleum ether (v/v, 1:20) to give compound **DPPh** (yellow solid, 41 mg, 28%). <sup>1</sup>H NMR (600 MHz, CDCl<sub>3</sub>, 298 K): δ = 8.17 (m, 4H), 8.14 (d, 2H), 7.95 (s, 1H), 7.94 (s, 1H), 7.85 (m, 8H), 7.77 (d, 1H), 7.76 (d, *J* = 6.0 MHz, 1H), 7.71 (s, 4H), 7.66-7.63 (m, 8H), 7.59-7.57 (m, 8H), 7.50-7.48 (m, 4H), 1.13 (s, 36H). <sup>13</sup>C NMR (150 MHz, CDCl<sub>3</sub>, 298 K): δ = 147.29, 147.27, 142.66, 142.60, 140.05, 137.23, 136.43, 135.98, 132.50, 132.42, 132.34, 131.36, 130.32, 130.24, 129.63, 129.60, 129.38, 129.33, 127.71, 127.64, 127.61, 126.92, 124.99, 124.44, 123.89, 122.28, 122.24, 34.77, 31.40. MS (MALDI-TOF): Calc. for C<sub>94</sub>H<sub>78</sub>: [M] 1206.61, found: [M+1] 1207.6.

#### Compound

1,3-di(2-(5,12-diphenyl-6:7,10:11-bis(4'-tert-butylbenzo)tetracene))benzene (**DMPH**).

A mixture of compound **1** (254 mg, 0.39 mmol), 1,3-benzenediboronic acid (**3**, 22 mg, 0.13 mmol), Pd(PPh<sub>3</sub>)<sub>4</sub> (52 mg, 0.045 mmol) and Na<sub>2</sub>CO<sub>3</sub> (432 mg, 4 mmol) in THF/H<sub>2</sub>O (40 mL/4mL, v/v, 10:1) was stirred in 65 °C for 5 days in nitrogen atmosphere. After cooling to room temperature, brine was added and then the solution was extracted with methylene chloride (50 mL × 3). The organic phase was collected, dried with sodium sulfate and further concentrated in reduced pressure. The crude product was purified through silica gel column chromatography with methylene chloride/petroleum ether (v/v, 3.5:100) to give compound **DMPH** (yellow solid, 70 mg, 44%). <sup>1</sup>H NMR (600 MHz, CDCl<sub>3</sub>, 298 K): δ = 8.20 (d, *J* = 6.0 MHz, 2H), 8.19 (d, *J* = 6.0 MHz, 2H), 8.16 (d, *J* = 6.0 MHz, 2H), 7.97 (d, *J* = 12.0 MHz, 2H), 7.91 (s, 1H), 7.86 (d, *J* = 6.0 MHz, 8H), 7.76 (d, 1 H), 7.75 (d, *J* = 6.0 MHz, 1H), 7.66 (d, *J* = 6.0 MHz, 8H), 7.60 (t, 6H), 7.54 (t, 4H), 7.52-7.49 (m, 3H), 7.44 (t, 2H), 1.14 (s, 18H), 1.13 (s, 18H). <sup>13</sup>C NMR (150 MHz, CDCl<sub>3</sub>, 298 K): δ = 147.30, 147.28, 142.80, 142.68, 142.59, 141.80, 137.77, 136.49, 135.99, 132.50, 132.45, 132.33, 131.41, 130.35, 129.64, 129.36, 127.68, 127.57, 126.95, 126.30, 124.78, 123.95, 123.92, 122.30, 122.28, 34.79, 31.41. MS (MALDI-TOF): Calc. for C<sub>94</sub>H<sub>78</sub>: [M] 1206.61, found: [M+1] 1207.5.

#### Compound

1,3,5-tri(2-(5,12-diphenyl-6:7,10:11-bis(4'-tert-butylbenzo)tetracene))benzene

(**TPPh**). A mixture of compound **4** (692 mg, 0.3 mmol), 1,3,5-tribromobenzene (**5**, 19

mg, 0.06 mmol), Pd(PPh<sub>3</sub>)<sub>4</sub> (60 mg, 0.05 mmol) and Na<sub>2</sub>CO<sub>3</sub> (416 mg, 4 mmol) in THF/H<sub>2</sub>O (40 mL/4mL, v/v, 10:1) was stirred in 65 °C for 5 days in nitrogen atmosphere. After the solution was cooled to room temperature, brine was added. The mixture solution was then extracted with methylene chloride (50 mL × 3) and the organic phase was collected, dried with sodium sulfate. After the organic phase was concentrated in reduced pressure, the as-prepared residue was purified through silica gel column chromatography with using methylene chloride/petroleum ether (v/v, 11:100) to afford compound **TPPh** (yellow solid, 68 mg, 64%). <sup>1</sup>H NMR (600 MHz, CDCl<sub>3</sub>, 298 K): δ = 8.24 (s, 3H), 8.20 (s, 6H), 8.01 (d, *J* = 6.0 MHz, 3 H), 7.87-7.85 (m, 15H), 7.78 (dd, *J*<sup>1</sup> = 6.0 MHz, *J*<sup>2</sup> = 12.0 MHz, 3H), 7.69-7.61 (m, 18H), 7.54-7.50 (m, 9H), 7.40 (t, 3H), 1.15-1.13 (d, 54H). <sup>13</sup>C NMR (150 MHz, CDCl<sub>3</sub>, 298 K): δ = 147.32, 147.29, 142.70, 142.68, 142.51, 142.45, 137.77, 136.53, 135.99, 132.49, 132.47, 132.32, 131.48, 129.99, 129.63, 129.35, 127.77, 127.63, 127.58, 126.94, 125.44, 125.27, 124.87, 123.94, 122.30, 34.79, 34.78, 31.42, 31.39. MS (MALDI-TOF): Calc. for C<sub>138</sub>H<sub>114</sub>: [M+1] 1770.89, found: [M+1] 1771.7.

**Compound 7.** A mixture of compound **4** (267 mg, 0.41 mmol) and (trimethylsilyl)acetylene (**6**, 61 mg, 0.62 mmol) were dissolved in dry THF/Et<sub>3</sub>N solution. CuI (4 mg, 0.02 mmol), PPh<sub>3</sub> (13 mg, 0.04 mmol) and Pd(PPh<sub>3</sub>)<sub>2</sub>Cl (16 mg, 0.02 mmol) were added successively. The mixture solution was stirred at 65 °C for 10 h under nitrogen atmosphere. After cooling to room temperature, the brine was added and then the solution was extracted with methylene chloride (20 mL × 3). The organic phase was collected, dried with anhydrous sodium sulfate and the solvent was

removed in reduced pressure. The crude product was further purified through column chromatography using methylene chloride/petroleum ether (v/v, 1:15) to afford the intermediate (light yellow solid, 225 mg, 83%). The intermediate (201 mg, 0.3 mmol) and tetrabutylammonium fluoride (79 mg, 0.3 mmol) were stirred at room temperature for 0.5 h. Methylene chloride and brine were added, and then the organic phase was collected. After the organic solvent was removed, the as-formed residue was further purified through column chromatography using methylene chloride/petroleum ether (v/v, 1:15) to give compound **7** (light yellow solid, 153 mg, 86%). <sup>1</sup>H NMR (600 MHz, CDCl<sub>3</sub>, 298 K):  $\delta$  = 8.14 (dd,  $J^1$  = 6.0 MHz,  $J^2$  = 12.0 MHz, 2H), 8.04 (s, 1H), 7.85 (s, 4H), 7.80 (d,  $J$  = 6.0 MHz, 1H), 7.57-7.54 (m, 8H), 7.48 (d,  $J$  = 12.0 MHz, 3H), 3.14 (s, 1H), 1.11 (s, 18H). <sup>13</sup>C NMR (150 MHz, CDCl<sub>3</sub>, 298 K):  $\delta$  = 147.34, 147.33, 142.33, 142.09, 136.00, 135.99, 132.41, 132.36, 131.27, 130.77, 130.34, 129.44, 129.38, 129.37, 129.35, 128.01, 127.73, 127.70, 127.68, 127.63, 126.99, 126.96, 126.93, 123.95, 123.91, 122.55, 122.48, 118.88, 84.57, 77.76, 34.78, 31.40, 31.39. MS (MALDI-TOF): Calc. for C<sub>46</sub>H<sub>38</sub>: [M] 590.30, found: [M] 590.4.

Compound **DPyA (8)**. A mixture of compound **7** (204 mg, 0.34 mmol), **1** (263 mg, 0.41 mmol), PPh<sub>3</sub> (7 mg, 0.027 mmol), CuI (14 mg, 0.073 mmol) and PdCl<sub>2</sub>(PPh<sub>3</sub>)<sub>2</sub> (15 mg, 0.021 mmol) in dry THF/Et<sub>3</sub>N (30 mL/10mL, v/v, 3:1) was stirred in 65 °C for 10 h under nitrogen atmosphere. After cooling to room temperature, brine was added and then the mixture solution was extracted with methylene chloride (30 mL × 3). The organic phase was collected, dried with anhydrous sodium sulfate and further

concentrated in reduced pressure. The crude product was purified through silica gel column chromatography with methylene chloride/petroleum ether (v/v, 70:4) to give compound **DPyA** (yellow solid, 181 mg, 46%).  $^1\text{H}$  NMR (600 MHz,  $\text{CDCl}_3$ , 298 K):  $\delta$  = 8.14 (dd, 4H), 8.08 (s, 2H), 7.85 (s, 8H), 7.83-7.80 (t, 2H), 7.62-7.56 (m, 17H), 7.48-7.47 (m, 5H), 1.12 (d, 36H).  $^{13}\text{C}$  NMR (150 MHz,  $\text{CDCl}_3$ , 298 K):  $\delta$  = 147.40, 147.37, 147.33, 142.41, 142.25, 142.29, 141.97, 136.07, 132.37, 131.71, 131.55, 131.15, 130.69, 130.58, 130.36, 129.51, 129.34, 127.76, 127.70, 127.64, 126.98, 126.96, 124.00, 123.96, 123.94, 122.67, 122.56, 122.45, 120.26, 118.55, 91.43, 83.29, 74.92, 34.80, 31.43. MS (MALDI-TOF): Calc. for  $\text{C}_{90}\text{H}_{74}$ : [M] 1155.55, found: [M] 1155.9, [M+Na $^+$ ] 1178.9.

#### Compound

1,2,3,4,5,6-hexa(2-(5,12-diphenyl-6:7,10:11-bis(4'-tert-butylbenzo)tetracene))benzene (**HPPh**). **DPyA** (222 mg, 0.91 mmol) was firstly dissolved in 1,4-dioxane (20 mL) in nitrogen atmosphere and then  $\text{Co}_2(\text{CO})_8$  (6.5 mg, 0.02 mmol) was added to the solution. The mixture was stirred and refluxed for 48 h. After cooling room temperature, brine was added and the reaction mixture was extracted with methylene chloride (20 mL  $\times$  3). The organic phase was collected, dried with anhydrous sodium sulfate and further removed in reduced pressure. The as-prepared residue was further purified through column chromatography (silica gel) with methylene chloride/petroleum ether (v/v, 70:4) to afford **HPPh** (light yellow solid, 20 mg, 9%). MS (MALDI-TOF): Calc. for  $\text{C}_{270}\text{H}_{222}$ : [M] 3466.65, found: [M] 3466.5.

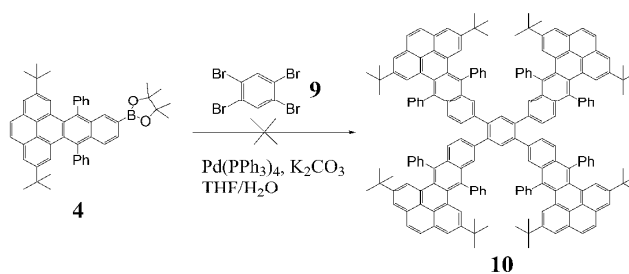

**Figure S1** the synthetic procedure to compound **10**

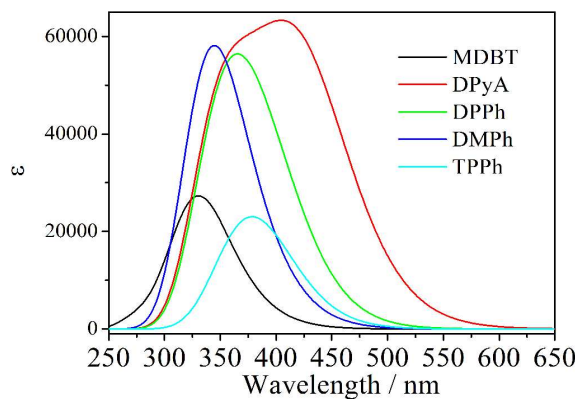

**Figure S2** the simulated UV-Vis absorption spectra of compounds **MDBT** to **DPyA**

**Table S1. Physical Properties of MDBT-HPPh**

| Comp.        | Absorption/film<br>(nm) | Emission/<br>film(nm) | $\Phi_f$ | $\tau$<br>[ns] | $K_r$<br>[ $10^7 \text{ s}^{-1}$ ] | $K_{nr}$<br>[ $10^7 \text{ s}^{-1}$ ] |
|--------------|-------------------------|-----------------------|----------|----------------|------------------------------------|---------------------------------------|
| <b>MDBT</b>  | 334/340                 | 437/467               | 0.25     | 18.8           | 1.33                               | 39.9                                  |
| <b>DPPh</b>  | 355/355                 | 448/483               | 0.47     | 18.0           | 2.61                               | 29.4                                  |
| <b>DMPPh</b> | 348/352                 | 445/469               | 0.42     | 19.3           | 2.18                               | 21.8                                  |
| <b>TPPh</b>  | 352/353                 | 447/470               | 0.49     | 20.2           | 2.43                               | 25.2                                  |
| <b>DPyA</b>  | 359/360                 | 456/483               | 0.67     | 11.5           | 5.83                               | 28.7                                  |
| <b>HPPh</b>  | 352/357                 | 449/535               | 0.21     | 16.3           | 1.29                               | 48.5                                  |

**Table S2** CV data and thermal properties

| Comp.        | HOMO  | HOMO<br>(calculation) | LUMO  | LUMO<br>(calculation) | $E_g$ | $T_d$ (5% weight<br>loss, $^{\circ}\text{C}$ ) |
|--------------|-------|-----------------------|-------|-----------------------|-------|------------------------------------------------|
| <b>MDBT</b>  | -5.32 | -5.33                 | -2.0  | -1.50                 | 3.32  | 370                                            |
| <b>DPPh</b>  | -5.17 | -5.20                 | -2.29 | -1.68                 | 2.88  | 462                                            |
| <b>DMPPh</b> | -5.26 | -5.28                 | -2.01 | -1.61                 | 3.25  | 241                                            |
| <b>TPPh</b>  | -5.26 | -5.27                 | -2.26 | -1.62                 | 3.00  | 232                                            |
| <b>DPyA</b>  | -5.31 | -5.12                 | -2.54 | -1.88                 | 2.77  | 444                                            |
| <b>HPPh</b>  | -5.29 |                       | -2.27 |                       | 2.92  | 277                                            |



**Table S3** Device performances of compounds **DPPh-TPPh**

| Device      | $V_{\text{on}}$<br>(V) | $PE_{\text{max}}$<br>lm/w | $LE_{\text{max}}$<br>cd/A | EQE<br>% | 100cd/m <sup>2</sup> |      | 1000 cd/m <sup>2</sup> |      |
|-------------|------------------------|---------------------------|---------------------------|----------|----------------------|------|------------------------|------|
|             |                        |                           |                           |          | PE                   | LE   | PE                     | LE   |
| <b>DPPh</b> | 4.6                    | 1.32                      | 2.02                      | 0.78     | 1.10                 | 1.97 | 0.50                   | 1.26 |
| <b>DMPH</b> | 5.4                    | 1.30                      | 2.23                      | 1.06     | 0.79                 | 1.46 | 0.16                   | 0.51 |
| <b>TPPh</b> | 5.2                    | 1.09                      | 1.80                      | 1.07     | 0.91                 | 1.63 | 0.87                   | 0.33 |

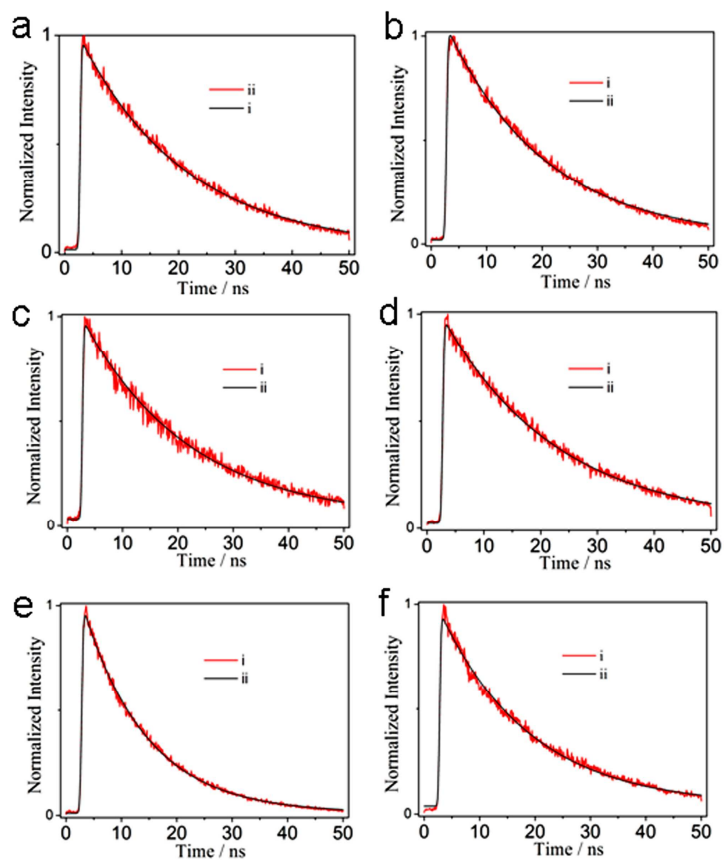**Figure S3** Fluorescence decay of compounds (a) **MDBT**, (b) **DPPh**, (c) **DMPH**, (d) **TPPh**, (e) **DPyA** and (f) **HPPh** in methylene chloride, (i) experimental result, (ii) simulation line.

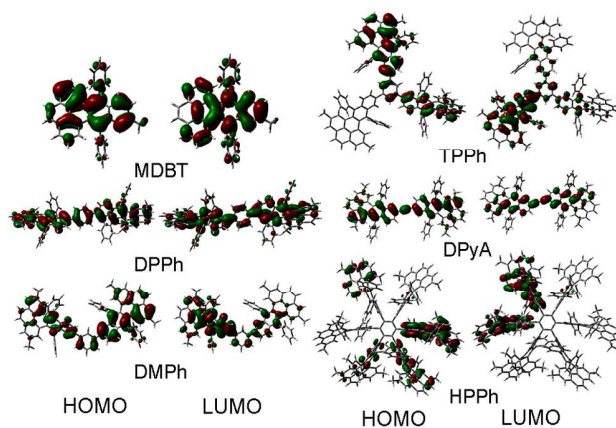

**Figure S4** The frontier molecular orbitals (HOMO and LUMO) of compounds **MDBT-HPPh** obtained through DFT calculations at the B3LYP/6-31G\*

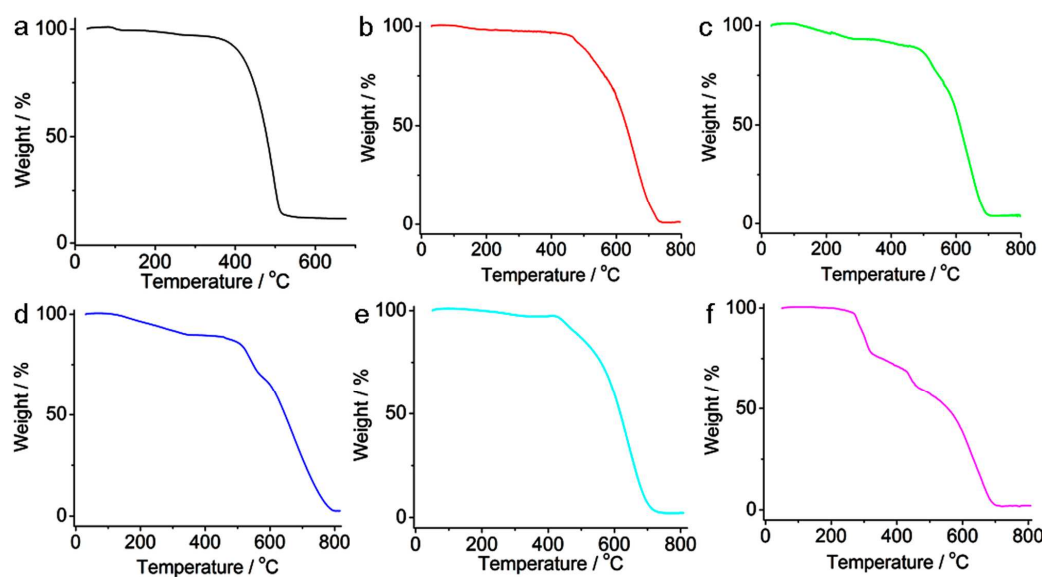

**Figure S5** TGA data of (a) **MDBT**, (b) **DPPh**, (c) **DMPH**, (d) **TPPh**, (e) **DPyA**, (f) **HPPh** under nitrogen at a heating rate of 10 degree/min.

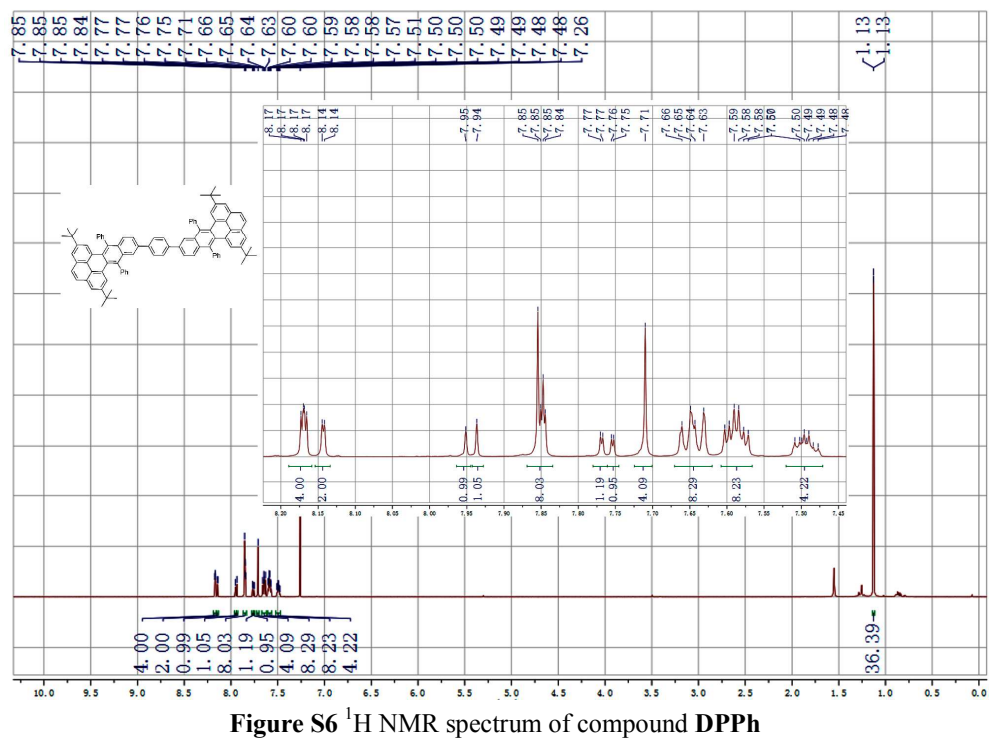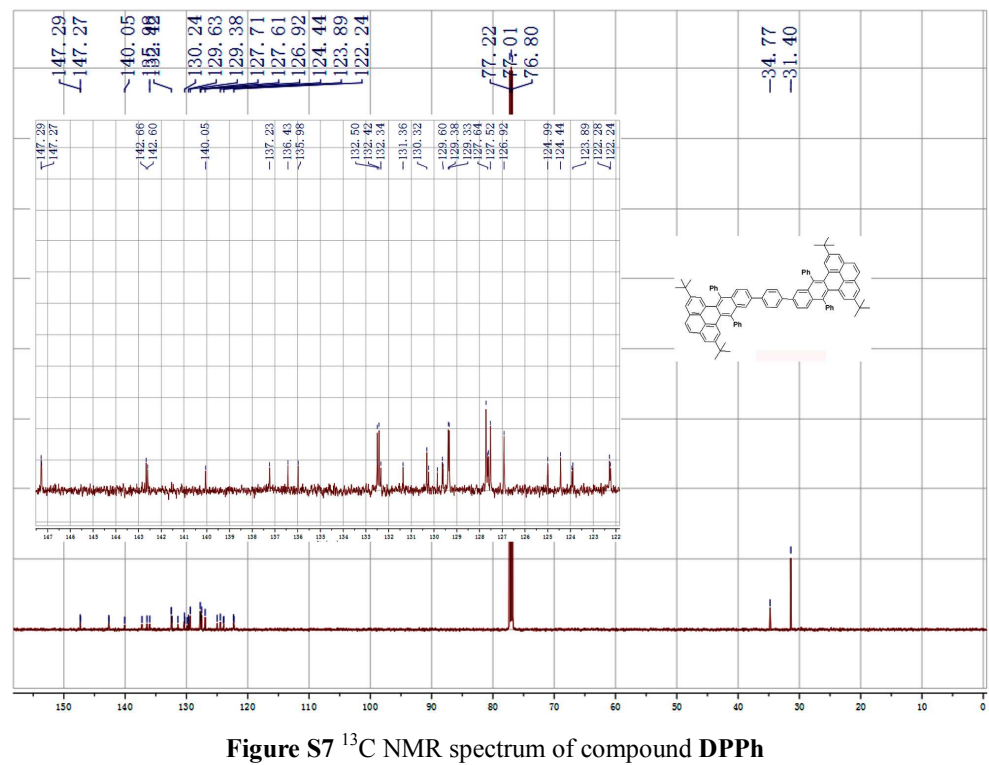

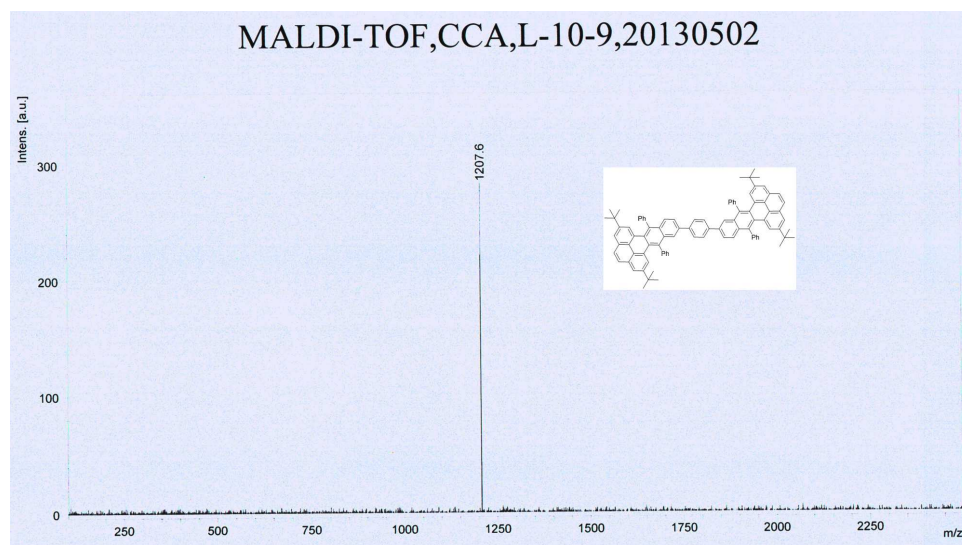

Figure S8 MALDI-TOF mass spectrum of compound **DPPh**

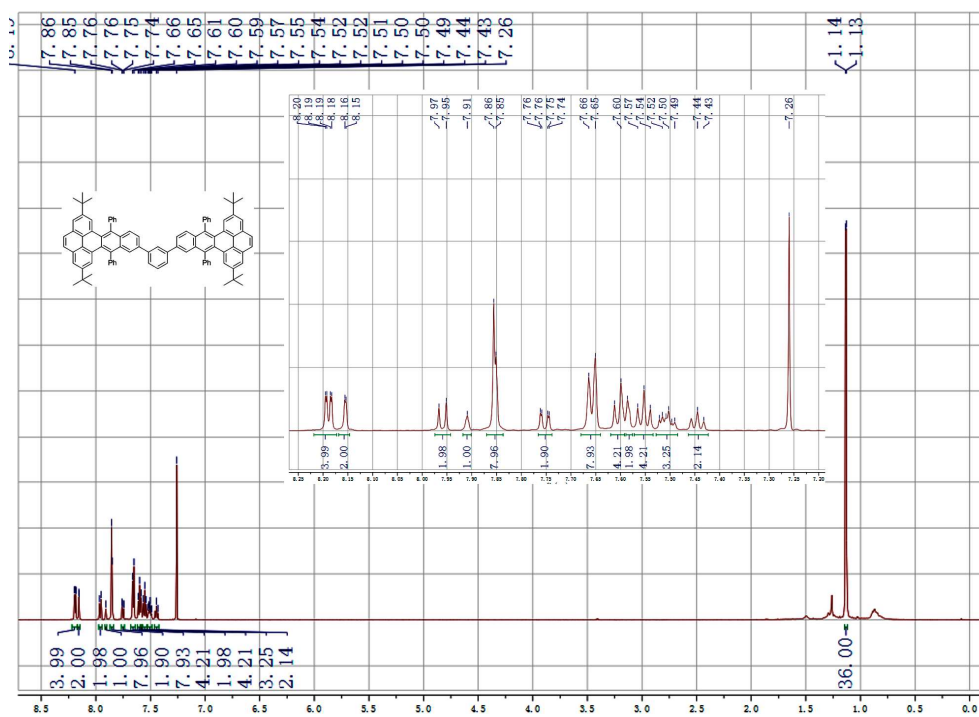

Figure S9  $^1\text{H}$  NMR spectrum of compound **DMPH**

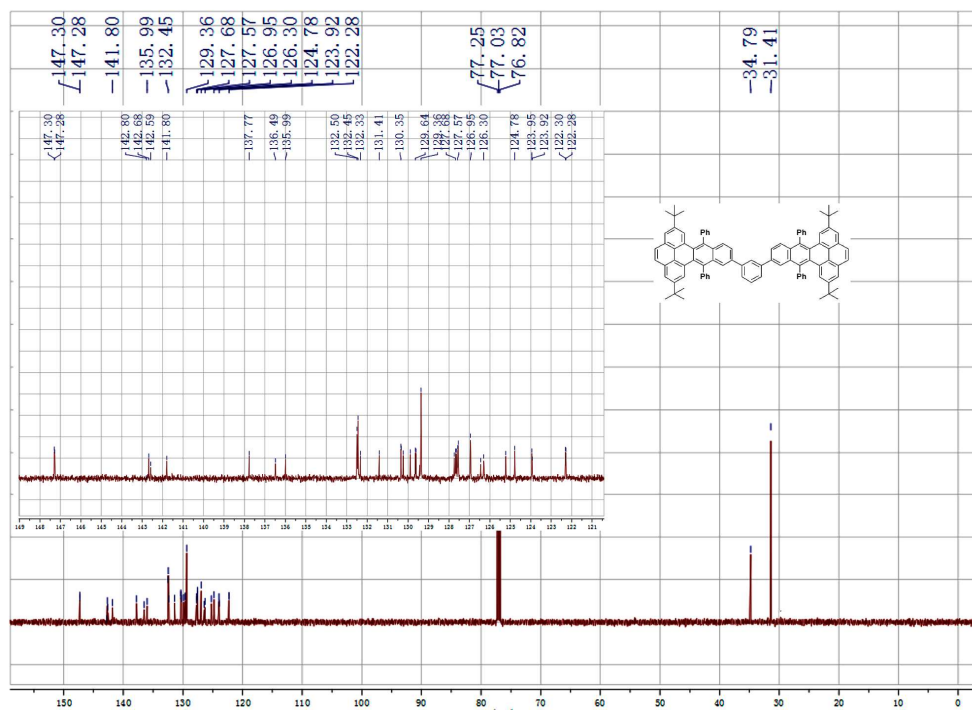

Figure S10  $^{13}\text{C}$  NMR spectrum of compound DMPh

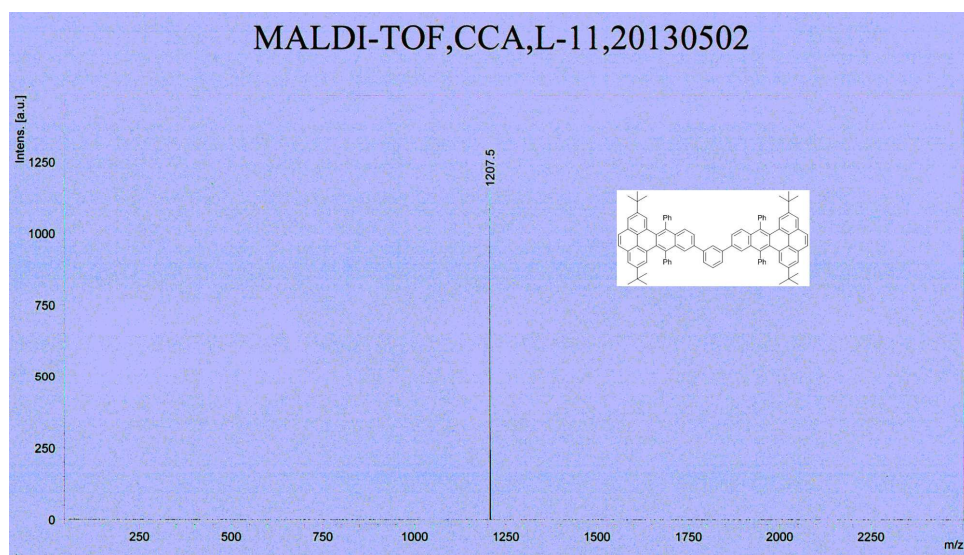

Figure S11 MALDI-TOF mass spectrum of compound DMPh



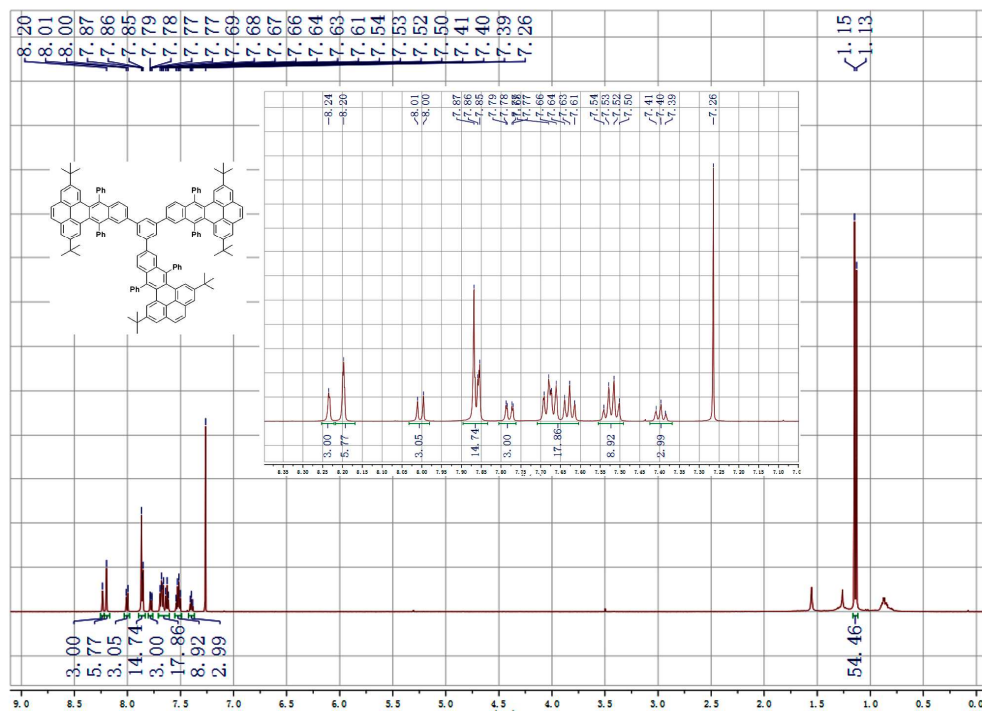

**Figure S12** <sup>1</sup>H NMR spectrum of compound TPPh

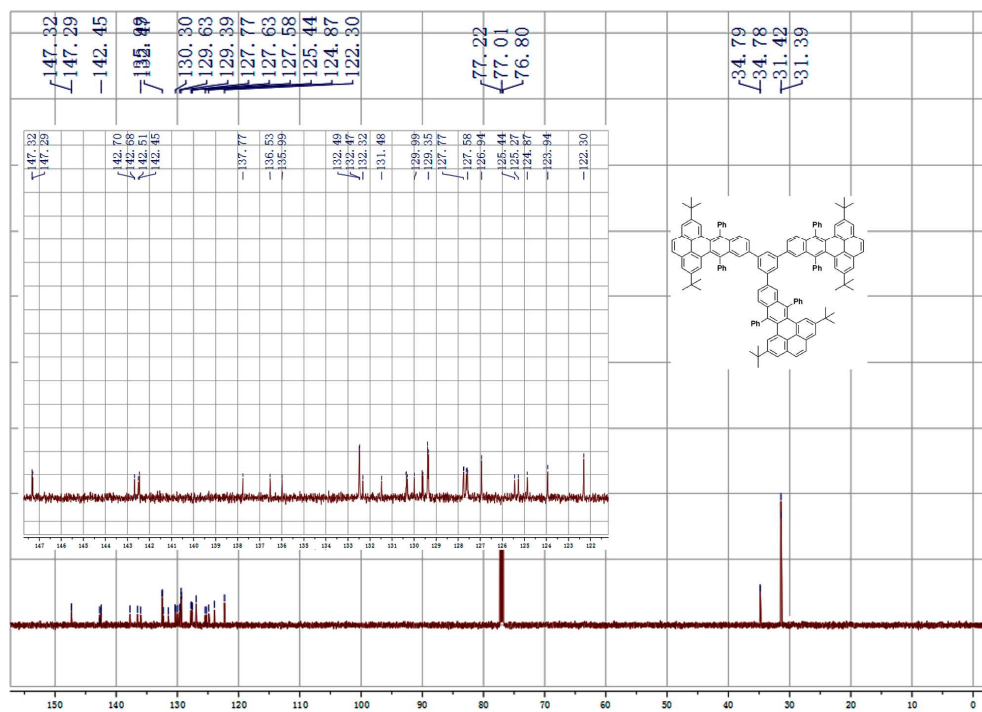

**Figure S13** <sup>13</sup>C NMR spectrum of compound TPPh

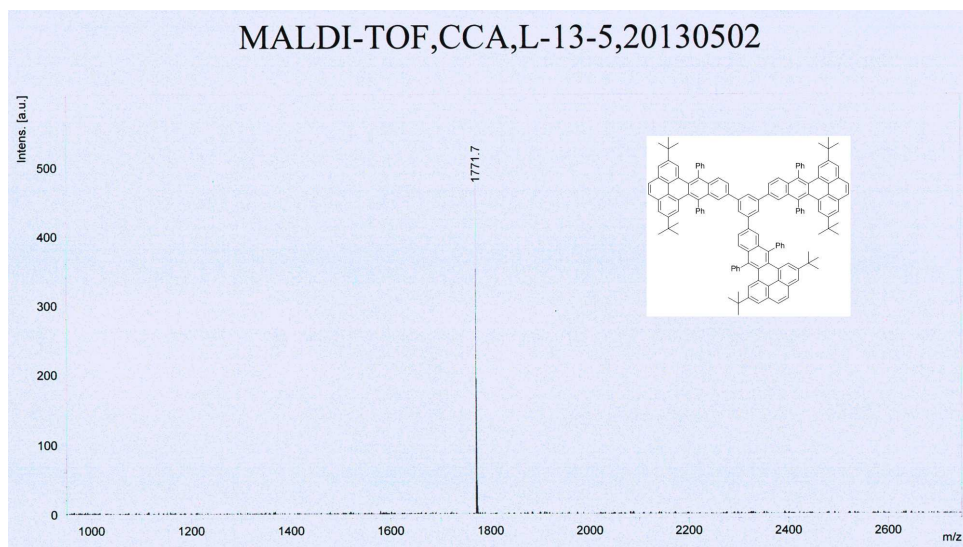

**Figure S14** MALDI-TOF mass spectrum of compound **TPPh**

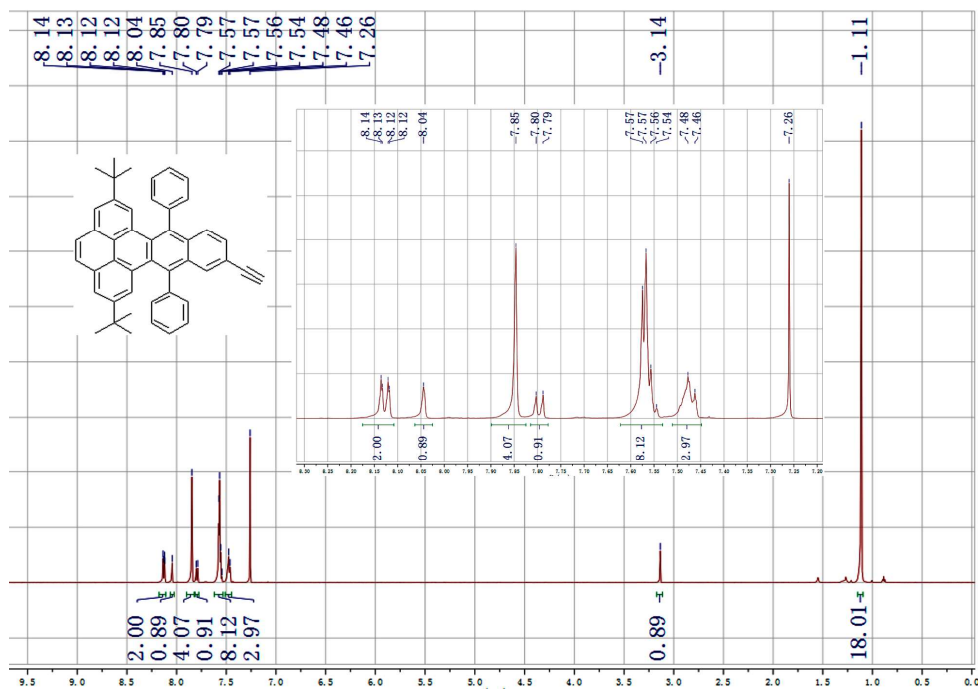

**Figure S15**  $^1\text{H}$  NMR spectrum of compound **7**

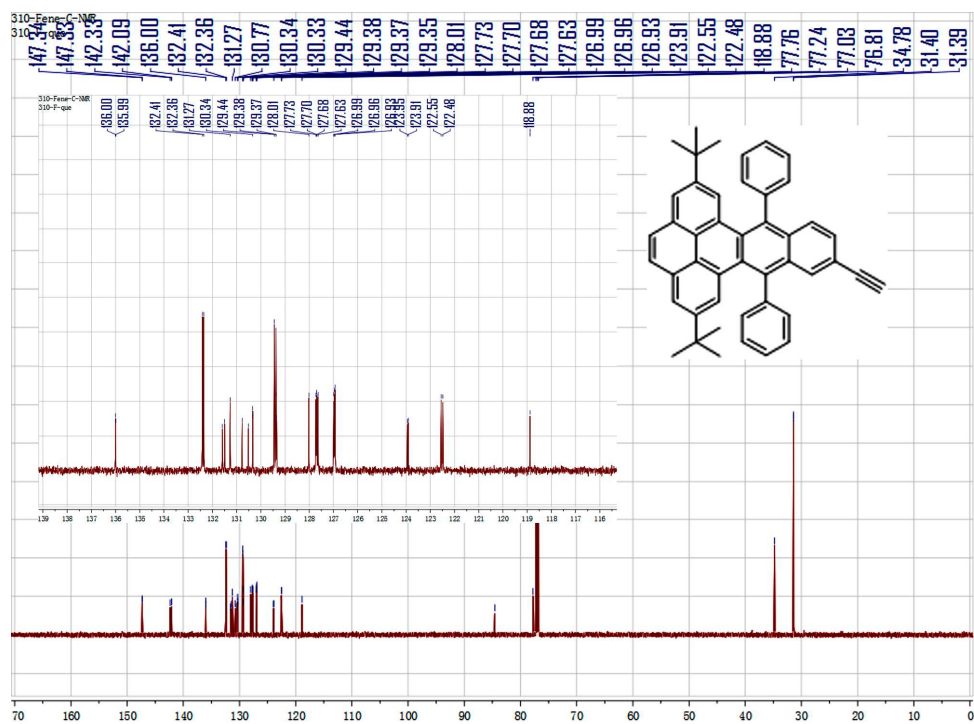

Figure S16  $^{13}\text{C}$  NMR spectrum of compound 7

MALDI-TOF,CCA,PY-2,20130325

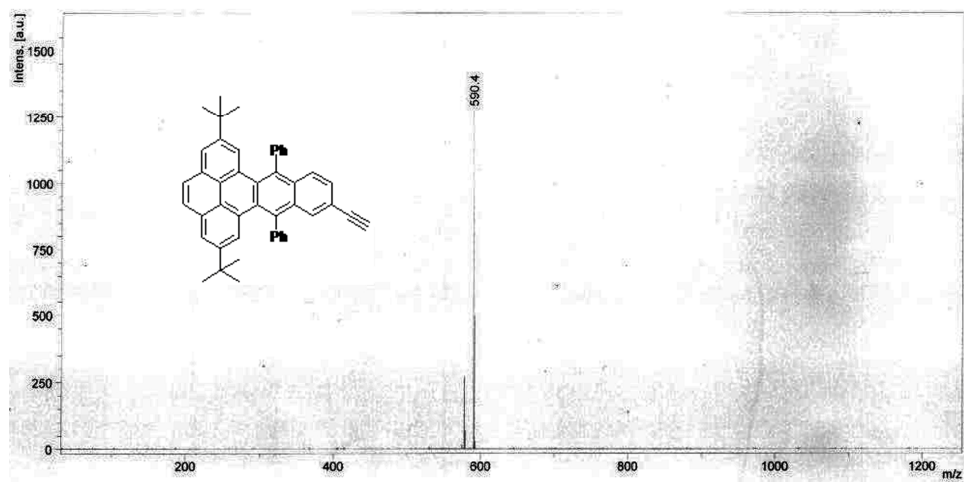

Figure S17 MALDI-TOF mass spectrum of compound 7



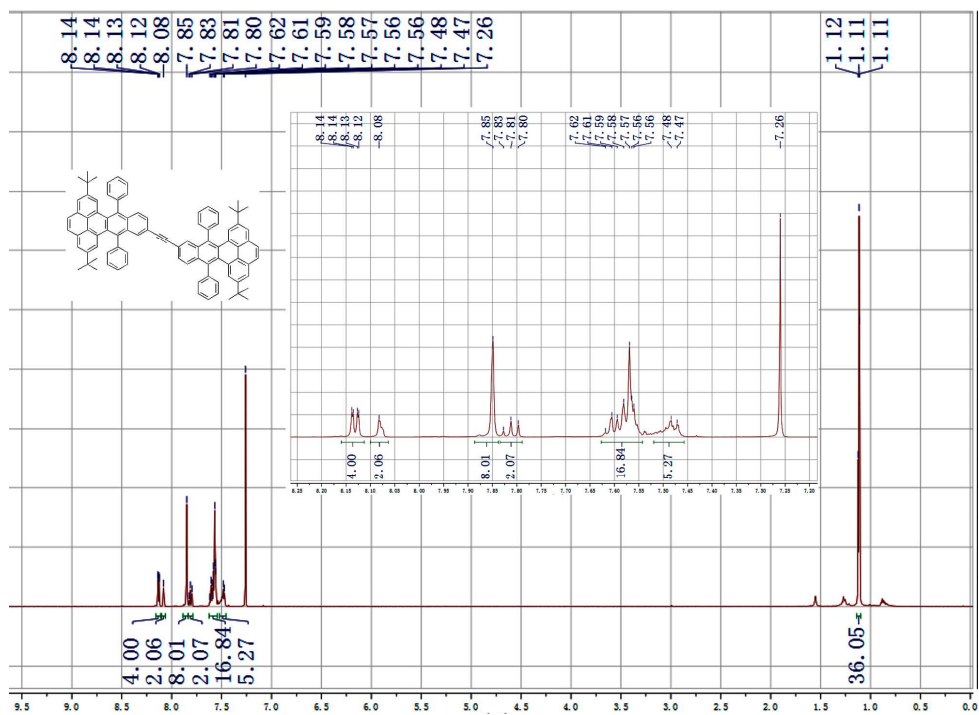

Figure S18  $^1\text{H}$  NMR spectrum of compound DPyA

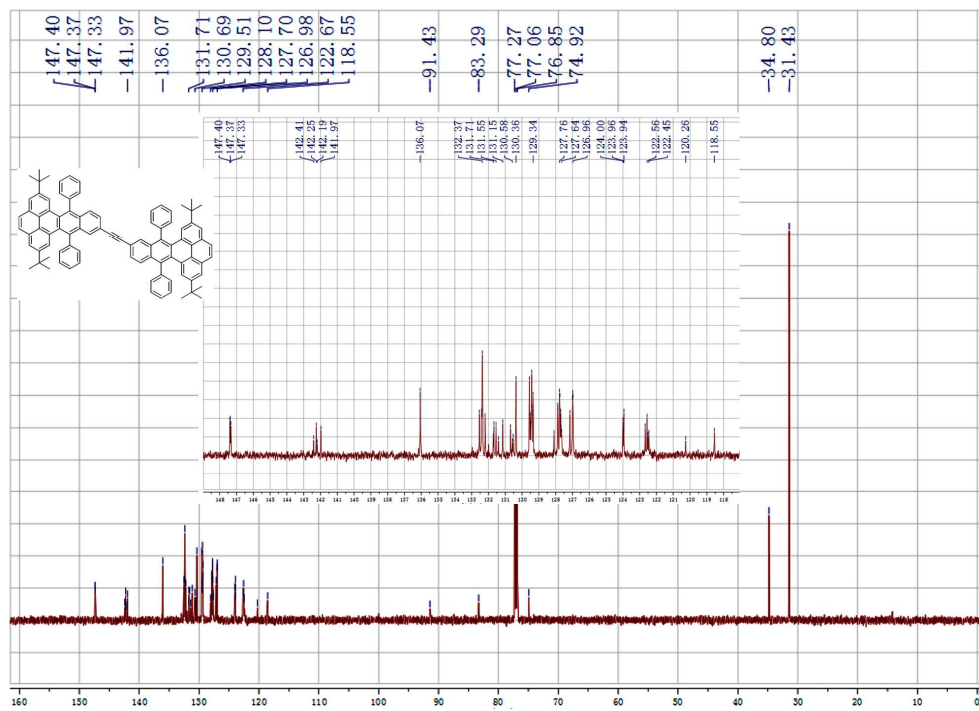

Figure S19  $^{13}\text{C}$  NMR spectrum of compound DPyA

MALDI-TOF,CCA,PY-3,20130325

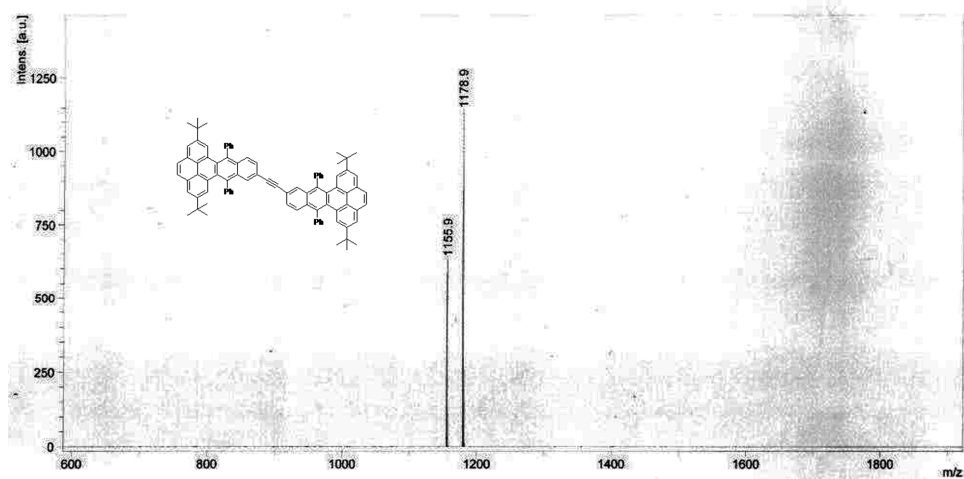

Figure S20 MALDI-TOF spectrum of compound DPyA

MALDI-TOF,CCA,PY-4,2013-03-04

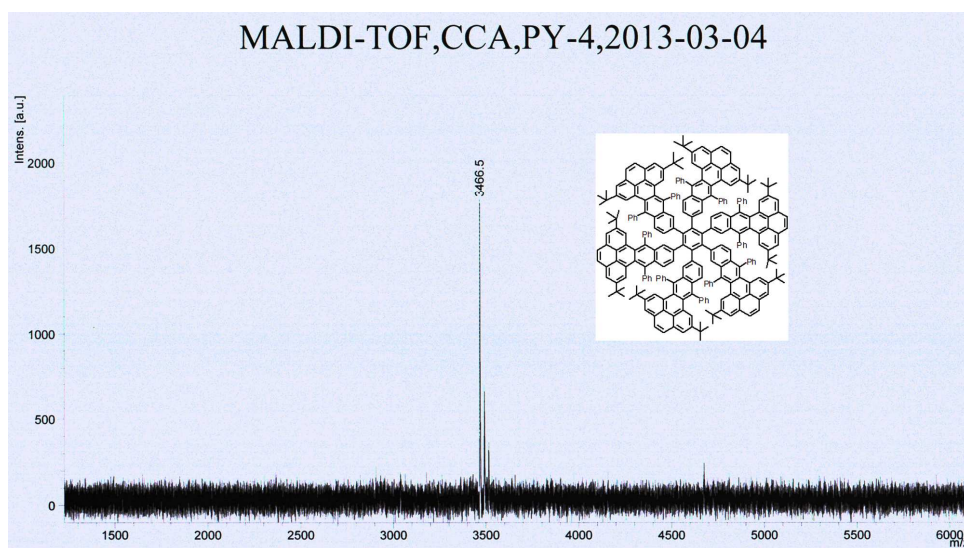

Figure S21 MALDI-TOF spectrum of compound HPPh
